# Supplementary figures and images for: Comparison of the Performance of Photovoltaic Power Generation-Consumption System with Push-Pull Converter under the Effect of Five Different Types of Controllers
Source: Hindawi journal article supplement (doi:10.1155/2019/3810970), 2019-12-07

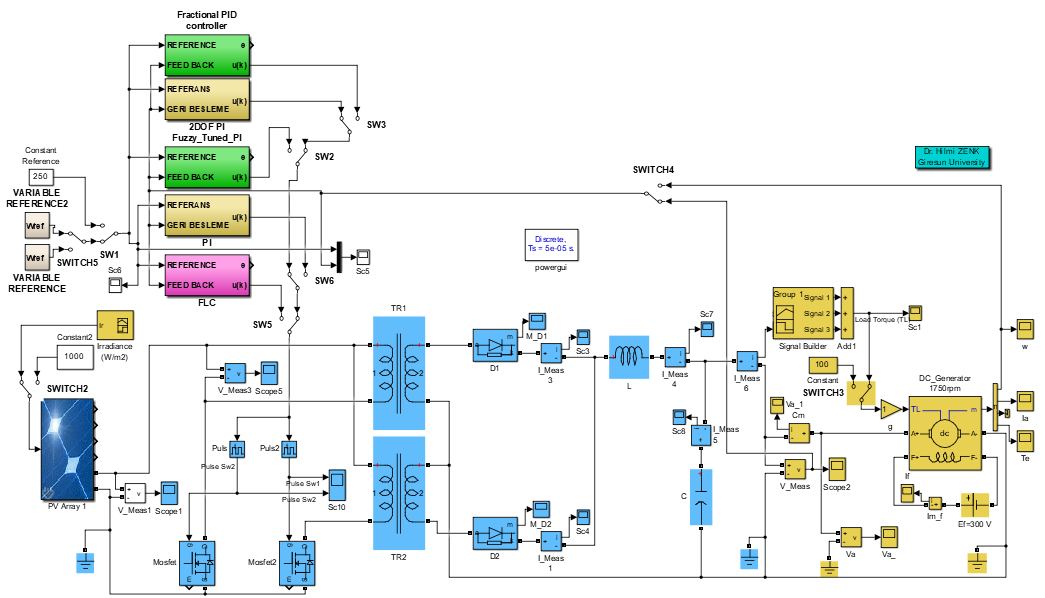

Supplement: f1 [file 3810970.f1.docx]
